# Supplementary material
Source: PubMed Central journal article supplement (PMC4996148)
Supplement: supp_jiw242_jiw242supp.pdf [file supp_jiw242_jiw242supp.pdf]

| <b>Chrom</b> | <b>Position</b> | <b>Reference</b> | <b>Altrenate</b> | <b>Region</b> | <b>Effect</b>  |
|--------------|-----------------|------------------|------------------|---------------|----------------|
| CP000255     | 417             | G                | T                | NON-CODING    | -              |
| CP000255     | 16135           | G                | A                | CODING        | START LOST     |
| CP000255     | 35817           | A                | T                | NON-CODING    | -              |
| CP000255     | 76849           | A                | G                | NON-CODING    | -              |
| CP000255     | 87551           | C                | A                | CODING        | SYNONYMOUS     |
| CP000255     | 115262          | A                | G                | CODING        | NON-SYNONYMOUS |
| CP000255     | 238924          | G                | A                | CODING        | NON SYNONYMOUS |
| CP000255     | 334170          | T                | A                | CODING        | NON-SYNONYMOUS |
| CP000255     | 334171          | T                | A                | CODING        | STOP GAINED    |
| CP000255     | 350947          | A                | G                | CODING        | SYNONYMOUS     |
| CP000255     | 414724          | C                | T                | NON-CODING    | -              |
| CP000255     | 507017          | A                | G                | CODING        | NON-SYNONYMOUS |
| CP000255     | 534272          | G                | A                | CODING        | NON-SYNONYMOUS |
| CP000255     | 691057          | T                | C                | NON-CODING    | -              |
| CP000255     | 802202          | T                | C                | NON-CODING    | -              |
| CP000255     | 816938          | A                | G                | CODING        | SYNONYMOUS     |
| CP000255     | 848576          | G                | A                | CODING        | NON SYNONYMOUS |
| CP000255     | 855559          | C                | A                | NON-CODING    | -              |
| CP000255     | 865624          | C                | T                | CODING        | NON SYNONYMOUS |
| CP000255     | 891071          | C                | T                | CODING        | STOP GAINED    |
| CP000255     | 906463          | T                | A                | NON-CODING    | -              |
| CP000255     | 941455          | G                | A                | CODING        | STOP GAINED    |
| CP000255     | 950418          | A                | G                | CODING        | SYNONYMOUS     |
| CP000255     | 975709          | T                | A                | CODING        | NON SYNONYMOUS |
| CP000255     | 975798          | A                | T                | CODING        | STOP GAINED    |
| CP000255     | 1046867         | T                | A                | CODING        | STOP GAINED    |
| CP000255     | 1074284         | T                | G                | NON-CODING    | -              |
| CP000255     | 1111775         | T                | C                | CODING        | SYNONYMOUS     |
| CP000255     | 1181644         | C                | A                | CODING        | NON-SYNONYMOUS |
| CP000255     | 1246149         | T                | A                | CODING        | NON-SYNONYMOUS |
| CP000255     | 1263354         | A                | T                | CODING        | NON SYNONYMOUS |
| CP000255     | 1302306         | T                | C                | CODING        | NON-SYNONYMOUS |
| CP000255     | 1324043         | A                | G                | CODING        | SYNONYMOUS     |
| CP000255     | 1405837         | C                | T                | CODING        | NON-SYNONYMOUS |
| CP000255     | 1420581         | T                | A                | CODING        | NON-SYNONYMOUS |
| CP000255     | 1449721         | G                | A                | CODING        | NON-SYNONYMOUS |
| CP000255     | 1622717         | A                | T                | CODING        | SYNONYMOUS     |
| CP000255     | 1770310         | C                | T                | CODING        | SYNONYMOUS     |
| CP000255     | 1885211         | G                | A                | CODING        | SYNONYMOUS     |

|          |           |   |            |                |
|----------|-----------|---|------------|----------------|
| CP000255 | 1926344 G | T | CODING     | NON-SYNONYMOUS |
| CP000255 | 1955851 G | C | CODING     | NON-SYNONYMOUS |
| CP000255 | 2019634 T | C | CODING     | SYNONYMOUS     |
| CP000255 | 2019637 T | C | CODING     | SYNONYMOUS     |
| CP000255 | 2130440 T | C | CODING     | NON-SYNONYMOUS |
| CP000255 | 2149492 G | A | CODING     | NON-SYNONYMOUS |
| CP000255 | 2165813 T | C | CODING     | NON-SYNONYMOUS |
| CP000255 | 2476503 T | G | CODING     | NON-SYNONYMOUS |
| CP000255 | 2488715 A | G | CODING     | NON-SYNONYMOUS |
| CP000255 | 2499313 A | G | NON-CODING | -              |
| CP000255 | 2504807 G | C | NON-CODING | -              |
| CP000255 | 2554758 C | T | CODING     | STOP-GAINED    |
| CP000255 | 2624155 A | C | NON-CODING | -              |
| CP000255 | 2678946 A | G | CODING     | SYNONYMOUS     |
| CP000255 | 2705337 G | A | CODING     | NON-SYNONYMOUS |
| CP000255 | 2734666 C | T | CODING     | NON-SYNONYMOUS |
| CP000255 | 2746919 C | T | CODING     | NON-SYNONYMOUS |
| CP000255 | 2766651 G | A | CODING     | NON-SYNONYMOUS |
| CP000255 | 2807973 A | C | CODING     | NON-SYNONYMOUS |
| CP000255 | 2808635 G | T | CODING     | NON-SYNONYMOUS |
| CP000255 | 2848174 A | G | CODING     | SYNONYMOUS     |
| CP000255 | 2849850 A | G | CODING     | SYNONYMOUS     |
| CP000255 | 2857261 G | T | CODING     | NON-SYNONYMOUS |

| <b>Codon</b> | <b>AA Change</b> | <b>Gene</b>   |
|--------------|------------------|---------------|
| -            | -                | -             |
| atG/atA      | M -> I           | SAUSA300_0012 |
| -            | -                | -             |
| -            | -                | -             |
| gtC/gtA      | V -> V           | <i>copA</i>   |
| tAt/tGt      | Y -> C           | SAUSA300_0104 |
| Gaa/Aaa      | E -> K           | SAUSA300_0202 |
| Ttg/Atg      | L -> M           | SAUSA300_0280 |
| tTg/tAg      | L -> STOP        | SAUSA300_0280 |
| tcA/tcG      | S -> S           | SAUSA300_0299 |
| -            | -                | -             |
| gAa/gGa      | E -> G           | <i>treC</i>   |
| -            | -                | -             |
| gGc/gAc      | G -> D           | <i>glmU</i>   |
| -            | -                | -             |
| -            | -                | -             |
| ggA/ggG      | G -> G           | <i>yfiA</i>   |
| Gta/Ata      | V -> I           | <i>eno</i>    |
| -            | -                | -             |
| aCa/aTa      | T -> I           | SAUSA300_0775 |
| Caa/Taa      | Q -> STOP        | SAUSA300_0811 |
| -            | -                | -             |
| Cag/Tag      | Q -> STOP        | <i>glpQ</i>   |
| gcA/gcG      | A -> A           | <i>rexB</i>   |
| aTt/aAt      | I -> N           | <i>oppC</i>   |
| Aaa/Taa      | K -> STOP        | <i>oppC</i>   |
| Aaa/Taa      | K -> STOP        | <i>atl</i>    |
| -            | -                | -             |
| ggT/ggC      | G -> G           | <i>pyc</i>    |
| gaC/gaA      | D -> E           | <i>ftsZ</i>   |
| aTa/aAa      | L -> K           | <i>rnhB</i>   |
| Atg/Ttg      | M -> L           | <i>pyrH</i>   |
| tTg/tCg      | L -> S           | SAUSA300_1182 |
| tcA/tcG      | S -> S           | <i>glnA</i>   |
| cCt/cTt      | P -> L           | <i>pepF</i>   |
| Tca/Aca      | S -> T           | <i>dapB</i>   |
| Cca/Tca      | P -> S           | <i>msrA</i>   |
| gcT/gcA      | A -> A           | <i>lpdA</i>   |
| gcG/gcA      | A -> A           | <i>hemD</i>   |
| gaC/gaT      | D -> D           | <i>leuS</i>   |

|         |           |               |
|---------|-----------|---------------|
| atG/atT | M -> I    | SAUSA300_1744 |
| tCt/tGt | S -> C    | <i>lukD</i>   |
| aaT/aaC | N -> N    | SAUSA300_1858 |
| gaT/gaC | D -> D    | SAUSA300_1858 |
| gAt/gGt | D -> G    | SAUSA300_1975 |
| aGa/aAa | R -> K    | <i>agrA</i>   |
| aTg/aCg | M -> T    | <i>ilvD</i>   |
| Act/Cct | T -> P    | <i>tcaR</i>   |
| atA/atG | I -> M    | SAUSA300_2314 |
| -       | -         | -             |
| -       | -         | -             |
| tGg/tAg | W -> STOP | SAUSA300_2375 |
| -       | -         | -             |
| gcA/gcG | A -> A    | SAUSA300_2481 |
| gCa/gTa | A -> V    | SAUSA300_2500 |
| Gaa/Aaa | E -> K    | <i>panC</i>   |
| aGt/aAt | S -> N    | SAUSA300_2542 |
| gCg/gTg | A -> V    | SAUSA300_2556 |
| aTc/aGc | I -> S    | SAUSA300_2586 |
| Cgt/Agt | R -> S    | SAUSA300_2587 |
| taT/taC | Y -> Y    | SAUSA300_2621 |
| ttA/ttG | L -> L    | SAUSA300_2622 |
| Gca/Tca | A -> S    | <i>nixA</i>   |

| Gene Name                                                                                                     | Patient |
|---------------------------------------------------------------------------------------------------------------|---------|
| -                                                                                                             | D2      |
| Putative homoserine O-acetyltransferase                                                                       | B1      |
| -                                                                                                             | B2      |
| -                                                                                                             | B2      |
| ATPase copper transport                                                                                       | D1      |
| Transcriptional regulator, AraC                                                                               | B1      |
| peptide ABC transporter permease                                                                              | C       |
| hypothetical protein                                                                                          | D1      |
| hypothetical protein                                                                                          | D1      |
| hypothetical protein                                                                                          | B2      |
| -                                                                                                             | A       |
| Alpha-phosphotrehalase                                                                                        | B1      |
| bifunctional N-acetylglucosamine-1-phosphate<br>uridylyltransferase/glucosamine-1-phosphate acetyltransferase | A       |
| -                                                                                                             | D2      |
| -                                                                                                             | A       |
| ribosomal subunit interface protein                                                                           | B2      |
| phosphopyruvate hydratase                                                                                     | D1      |
| -                                                                                                             | D1      |
| Hypothetical protein                                                                                          | C       |
| hypothetical protein                                                                                          | A       |
| -                                                                                                             | D2      |
| glycerophosphoryl diester phosphodiesterase                                                                   | A       |
| ATP-dependent helicase/deoxyribonuclease subunit B                                                            | C       |
| Peptide ABC transporter permease                                                                              | C       |
| Peptide ABC transporter permease                                                                              | C       |
| Autolysin                                                                                                     | B1      |
| -                                                                                                             | A       |
| pyruvate carboxylase                                                                                          | B2      |
| cell division protein FtsZ                                                                                    | D1      |
| ribonuclease HII                                                                                              | A       |
| Uridylate kinase                                                                                              | C       |
| pyruvate ferredoxin oxidoreductase, alpha subunit                                                             | A       |
| glutamine synthetase, type I                                                                                  | D2      |
| oligoendopeptidase F                                                                                          | D2      |
| dihydrodipicolinate reductase                                                                                 | D1      |
| methionine sulfoxide reductase A                                                                              | A       |
| dihydrolipoamide dehydrogenase                                                                                | A       |
| uroporphyrinogen III synthase                                                                                 | A       |
| leucyl-tRNA synthetase                                                                                        | D2      |

|                                      |    |
|--------------------------------------|----|
| hypothetical protein                 | D2 |
| leukotoxin LukD                      | D1 |
| hypothetical protein                 | B2 |
| hypothetical protein                 | B2 |
| Aerolysin/leukocidin family protein  | A  |
| accessory gene regulator protein A   | B2 |
| dihydroxy-acid dehydratase           | D2 |
| transcriptional regulator TcaR       | A  |
| hypothetical protein                 | D1 |
| -                                    | D2 |
| -                                    | A  |
| ABC transporter ATP-binding/permease | D2 |
| -                                    | D1 |
| hypothetical protein                 | D2 |
| Glycosyl transferase                 | B1 |
| pantoate--beta-alanine ligase        | D2 |
| putative AMP-binding enzyme          | B2 |
| ABC transporter protein              | B2 |
| hypothetical protein                 | D1 |
| accessory secretory protein Asp1     | D1 |
| Hypothetical protein                 | B1 |
| hypothetical protein                 | B2 |
| high-affinity nickel-transporter     | A  |

**Supplemental Table 1.** Average between-patient/group single nucleotide polymorphism differences. The number of base differences per sequence from averaging over all sequence pairs between patient groups are shown. The analysis involved 27 nucleotide sequences.

|      | PtA   | PtB1  | PtB2  | PtC   | PtD1  |
|------|-------|-------|-------|-------|-------|
| PtA  | -     |       |       |       |       |
| PtB1 | 49.20 | -     |       |       |       |
| PtB2 | 46.87 | 69.67 | -     |       |       |
| PtC  | 22.87 | 47.67 | 45.33 | -     |       |
| PtD1 | 52.80 | 73.60 | 73.27 | 51.27 | -     |
| PtD2 | 44.91 | 67.71 | 57.38 | 43.38 | 71.31 |

**Supplemental Table 2.** Frequency and characteristics of single nucleotide polymorphisms by patient and MRSA USA300 population.

|                                     | Patient A | Patient B | Patient B-2 | Patient C | Patient D | Patient D-2 |
|-------------------------------------|-----------|-----------|-------------|-----------|-----------|-------------|
| Isolates                            | 5         | 4         | 3           | 3         | 5         | 7           |
| Days                                | 744       | 424       | 46          | 222       | 112       | 227         |
| Synonymous                          | 2 (14.3%) | 1 (16.7%) | 3 (42.9%)   | 1 (16.7%) | 2 (33.3%) | 0 (0.0%)    |
| Non-synonymous                      | 7 (50.0%) | 3 (50.0%) | 3 (42.9%)   | 4 (66.7%) | 2 (33.3%) | 5 (83.3%)   |
| Stop lost                           | 0 (0.0%)  | 1 (16.7%) | 0 (0.0%)    | 0 (0.0%)  | 0 (0.0%)  | 0 (0.0%)    |
| Stop gained                         | 2 (14.4%) | 1 (16.7%) | 0 (0.0%)    | 1 (16.7%) | 0 (0.0%)  | 0 (0.0%)    |
| Non-coding                          | 3 (21.4%) | 0 (0.0%)  | 1 (14.3%)   | 0 (0.0%)  | 2 (33.3%) | 1 (16.7%)   |
| Total SNPs                          | 14        | 6         | 7           | 6         | 6         | 6           |
| Mean pairwise distance (SNP)        | 6         | 2.6       | 7.3         | 4         | 6         | 4           |
| Rate of Diversification (SNPs/year) | 2.9       | 2.2       | 57.9        | 6.6       | 19.6      | 6.4         |

**Supplementary Table 3.** SNP rate by USA300 subsystem. Subsystems were annotated using RAST (<http://rast.nmpdr.org/>). SNPs for all 27 USA300 isolates were stratified by subsystem. The sum of nucleotides among genes annotated as a specific subsystem were used to calculate a SNP rate (per 10,000 nucleotides) by subsystem, which was then compared to the rate of SNPs occurring in other subsystems. A rate ratio and 95% confidence interval was calculated. Asterisks are used to denote statistically significant p-values for rate ratios.

| <b>USA300 Subsystem Category</b>                 | <b>SNPs (% of total)</b> | <b>Nucleotides in subsystem (% of total)</b> | <b>Rate (per 10k) in subsystem</b> | <b>Rate (per 10k) among other subsystems</b> | <b>Rate Ratio (95% CI)</b> |
|--------------------------------------------------|--------------------------|----------------------------------------------|------------------------------------|----------------------------------------------|----------------------------|
| Membrane Transport                               | 8 (27.6)                 | 48,639 (3.8)                                 | 1.64                               | 0.25                                         | 6.69 (2.97-15.1)*          |
| Regulation and Cell signaling                    | 3 (10.3)                 | 45,701 (3.5)                                 | 0.66                               | 0.30                                         | 2.17 (0.65-7.16)           |
| Cell Division and Cell Cycle                     | 1 (3.4)                  | 18,397 (1.4)                                 | 0.54                               | 0.32                                         | 1.72 (0.23-12.6)           |
| Virulence, Disease and Defense                   | 5 (17.2)                 | 130,574 (10.1)                               | 0.38                               | 0.31                                         | 1.23 (0.47-3.23)           |
| Amino Acids and Derivatives                      | 4 (13.8)                 | 114,296 (8.8)                                | 0.35                               | 0.32                                         | 1.11 (0.38-3.17)           |
| Respiration                                      | 1 (3.4)                  | 31,176 (2.4)                                 | 0.32                               | 0.32                                         | 0.99 (0.14-7.34)           |
| Protein Metabolism                               | 2 (6.9)                  | 106,703 (8.2)                                | 0.19                               | 0.34                                         | 0.55 (0.13-2.33)           |
| Cofactors, Vitamins, Prosthetic Groups, Pigments | 2 (6.9)                  | 127,096 (9.8)                                | 0.16                               | 0.35                                         | 0.45 (0.11-1.90)           |
| RNA Metabolism                                   | 1 (3.4)                  | 71,479 (5.5)                                 | 0.14                               | 0.34                                         | 0.42 (0.06-3.06)           |
| Cell Wall and Capsule                            | 1 (3.4)                  | 88,193 (6.8)                                 | 0.11                               | 0.34                                         | 0.33 (0.05-2.43)           |
| Carbohydrates                                    | 1 (3.4)                  | 121,218 (9.4)                                | 0.08                               | 0.36                                         | 0.23 (0.03-1.69)           |



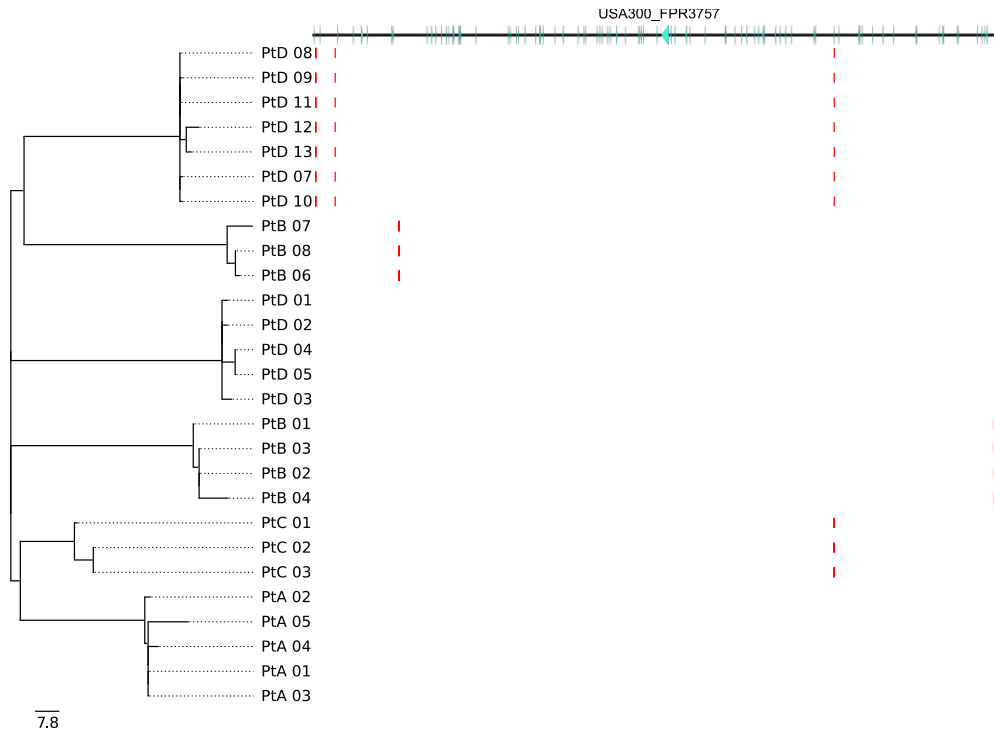

**Supplemental Figure 1.** Gubbins recombination analysis of 27 USA300 MRSA isolates. A recombination-free maximum-likelihood phylogeny is displayed on the left of the figure. The red bars display the location of recombination events against the USA300\_FPR3757 reference genome. All detected recombination events were shared among all intra-host isolates. SNPs introduced through recombination events were removed from the analysis.

Ser84->Leu  
▼

|       | 71         |             |            |            |            |            |            |
|-------|------------|-------------|------------|------------|------------|------------|------------|
| PtA01 | VGDVMGKYHP | HGDSSIYEAM  | VRMAQDFSyr | YPLVDGQGNF | GSMDGDGAAA | MRYTEARMTK | ITLELLRDIN |
| PtA02 | VGDVMGKYHP | HGDSSIYEAM  | VRMAQDFSyr | YPLVDGQGNF | GSMDGDGAAA | MRYTEARMTK | ITLELLRDIN |
| PtA03 | VGDVMGKYHP | HGDSSIYEAM  | VRMAQDFSyr | YPLVDGQGNF | GSMDGDGAAA | MRYTEARMTK | ITLELLRDIN |
| PtA04 | VGDVMGKYHP | HGDSSIYEAM  | VRMAQDFSyr | YPLVDGQGNF | GSMDGDGAAA | MRYTEARMTK | ITLELLRDIN |
| PtA05 | VGDVMGKYHP | HGDSSIYEAM  | VRMAQDFSyr | YPLVDGQGNF | GSMDGDGAAA | MRYTEARMTK | ITLELLRDIN |
| PtB01 | VGDVMGKYHP | HGDSSIYEAM  | VRMAQDFSyr | YPLVDGQGNF | GSMDGDGAAA | MRYTEARMTK | ITLELLRDIN |
| PtB02 | VGDVMGKYHP | HGDSSIYEAM  | VRMAQDFSyr | YPLVDGQGNF | GSMDGDGAAA | MRYTEARMTK | ITLELLRDIN |
| PtB03 | VGDVMGKYHP | HGDSSIYEAM  | VRMAQDFSyr | YPLVDGQGNF | GSMDGDGAAA | MRYTEARMTK | ITLELLRDIN |
| PtB04 | VGDVMGKYHP | HGDSSIYEAM  | VRMAQDFSyr | YPLVDGQGNF | GSMDGDGAAA | MRYTEARMTK | ITLELLRDIN |
| PtB06 | VGDVMGKYHP | HGDL SIYEAM | VRMAQDFSyr | YPLVDGQGNF | GSMDGDGAAA | MRYTEARMTK | ITLELLRDIN |
| PtB07 | VGDVMGKYHP | HGDL SIYEAM | VRMAQDFSyr | YPLVDGQGNF | GSMDGDGAAA | MRYTEARMTK | ITLELLRDIN |
| PtB08 | VGDVMGKYHP | HGDL SIYEAM | VRMAQDFSyr | YPLVDGQGNF | GSMDGDGAAA | MRYTEARMTK | ITLELLRDIN |
| PtC01 | VGDVMGKYHP | HGDSSIYEAM  | VRMAQDFSyr | YPLVDGQGNF | GSMDGDGAAA | MRYTEARMTK | ITLELLRDIN |
| PtC02 | VGDVMGKYHP | HGDSSIYEAM  | VRMAQDFSyr | YPLVDGQGNF | GSMDGDGAAA | MRYTEARMTK | ITLELLRDIN |
| PtC03 | VGDVMGKYHP | HGDSSIYEAM  | VRMAQDFSyr | YPLVDGQGNF | GSMDGDGAAA | MRYTEARMTK | ITLELLRDIN |
| PtD01 | VGDVMGKYHP | HGDSSIYEAM  | VRMAQDFSyr | YPLVDGQGNF | GSMDGDGAAA | MRYTEARMTK | ITLELLRDIN |
| PtD02 | VGDVMGKYHP | HGDSSIYEAM  | VRMAQDFSyr | YPLVDGQGNF | GSMDGDGAAA | MRYTEARMTK | ITLELLRDIN |
| PtD03 | VGDVMGKYHP | HGDSSIYEAM  | VRMAQDFSyr | YPLVDGQGNF | GSMDGDGAAA | MRYTEARMTK | ITLELLRDIN |
| PtD04 | VGDVMGKYHP | HGDSSIYEAM  | VRMAQDFSyr | YPLVDGQGNF | GSMDGDGAAA | MRYTEARMTK | ITLELLRDIN |
| PtD05 | VGDVMGKYHP | HGDSSIYEAM  | VRMAQDFSyr | YPLVDGQGNF | GSMDGDGAAA | MRYTEARMTK | ITLELLRDIN |
| PtD07 | VGDVMGKYHP | HGDL SIYEAM | VRMAQDFSyr | YPLVDGQGNF | GSMDGDGAAA | MRYTEARMTK | ITLELLRDIN |
| PtD08 | VGDVMGKYHP | HGDL SIYEAM | VRMAQDFSyr | YPLVDGQGNF | GSMDGDGAAA | MRYTEARMTK | ITLELLRDIN |
| PtD09 | VGDVMGKYHP | HGDL SIYEAM | VRMAQDFSyr | YPLVDGQGNF | GSMDGDGAAA | MRYTEARMTK | ITLELLRDIN |
| PtD10 | VGDVMGKYHP | HGDL SIYEAM | VRMAQDFSyr | YPLVDGQGNF | GSMDGDGAAA | MRYTEARMTK | ITLELLRDIN |
| PtD11 | VGDVMGKYHP | HGDL SIYEAM | VRMAQDFSyr | YPLVDGQGNF | GSMDGDGAAA | MRYTEARMTK | ITLELLRDIN |
| PtD12 | VGDVMGKYHP | HGDL SIYEAM | VRMAQDFSyr | YPLVDGQGNF | GSMDGDGAAA | MRYTEARMTK | ITLELLRDIN |
| PtD13 | VGDVMGKYHP | HGDL SIYEAM | VRMAQDFSyr | YPLVDGQGNF | GSMDGDGAAA | MRYTEARMTK | ITLELLRDIN |

**Supplemental Figure 2.** Alignment of DNA Gyrase A (*gyrA*) among 27 USA300 isolates demonstrating Ser84->Leu mutation conferring fluoroquinolone resistance.

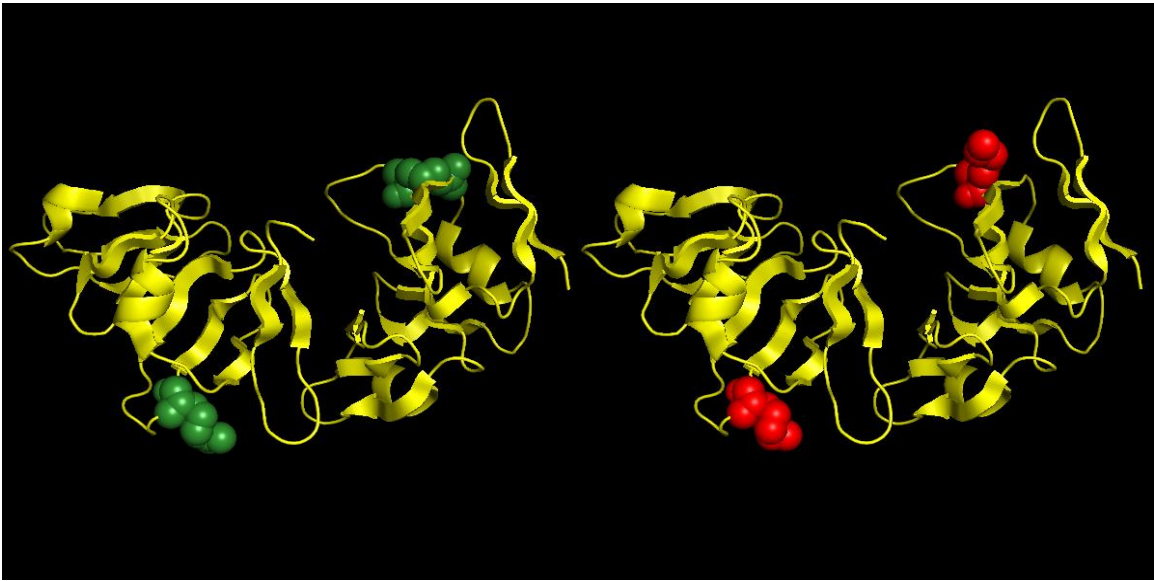

**Supplemental Figure 3.** Visualization of R170K mutation in *S. aureus* Accessory gene regulator protein A (T1YBU1). *agrA* is responsible for regulating the expression of several virulence genes and may have a role in biofilm production. The arginine to lysine mutation retained the same amino acid charge but varied in size.

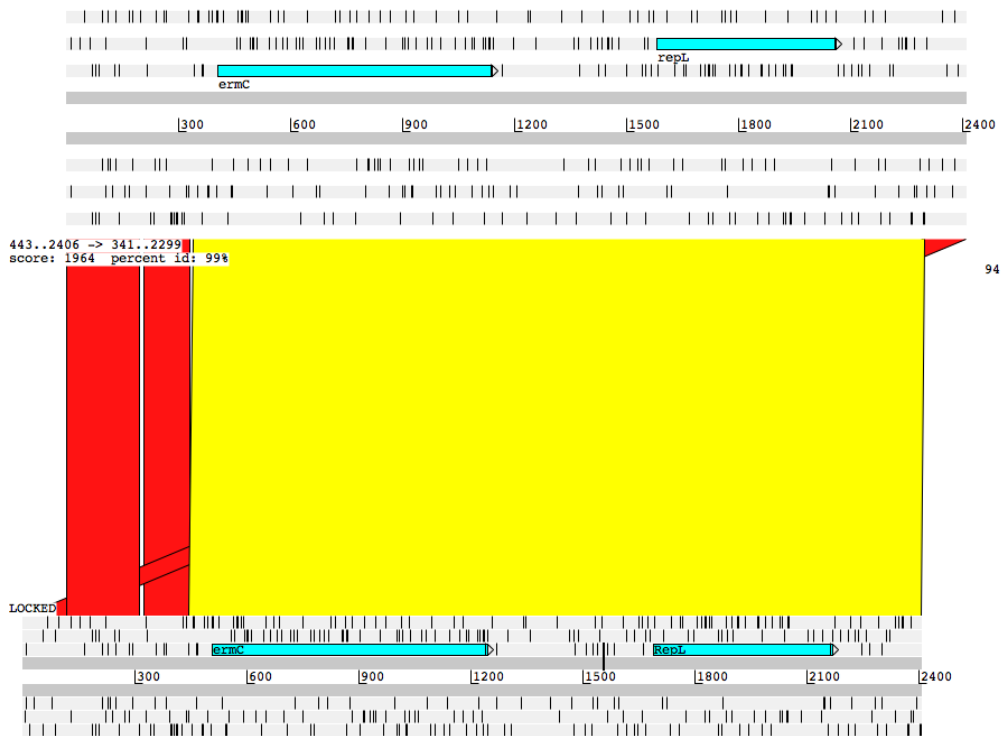

**Supplementary Figure 4.** Alignment of small, 2,407 bp plasmid present in isolates PtC-01 and PtC-03 with homology to 2.3-kb erythromycin resistance plasmid pPV141 from *Staphylococcus chromogenes* (GenBank: U82607). Plasmid pPV141 has a 58 bp deletion in the translational attenuator that results in the constitutive expression of *ermC* and clindamycin resistance (1).

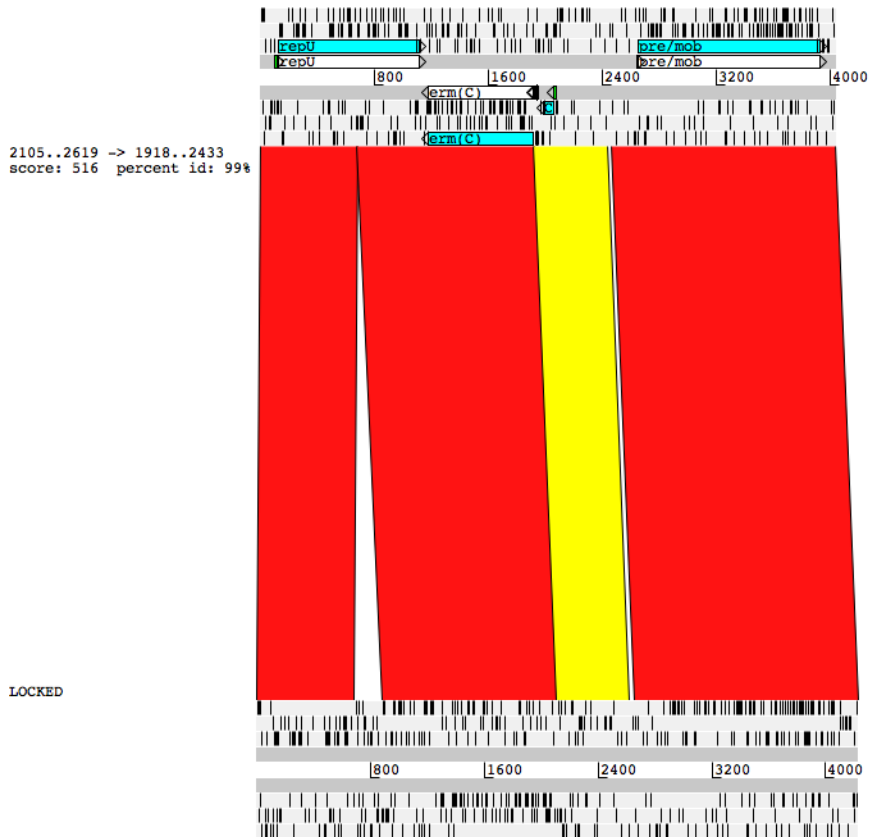

**Supplementary Figure 5.** Alignment of 4,295 bp plasmid present in isolates PtD-03 and PtD-04 to *Staphylococcus saprophyticus* pSES22 plasmid (GenBank: AM159501). Plasmid pSES22 possesses a constitutively expressed *ermC* gene that confers resistance to erythromycin and clindamycin, which is linked to a 22-bp tandem duplication in the *ermC* regulatory region (2). This regulatory region is highlighted in yellow and displays 99% identity. Plasmids present in PtD-03 and PtD-04 are identical to each other and possess a truncated version of the 22-bp duplication. Both isolates PtD-03 and PtD-04 were constitutively resistant to clindamycin. Visualization was constructed with Artemis Comparison Tool (ACT v13.0.0).

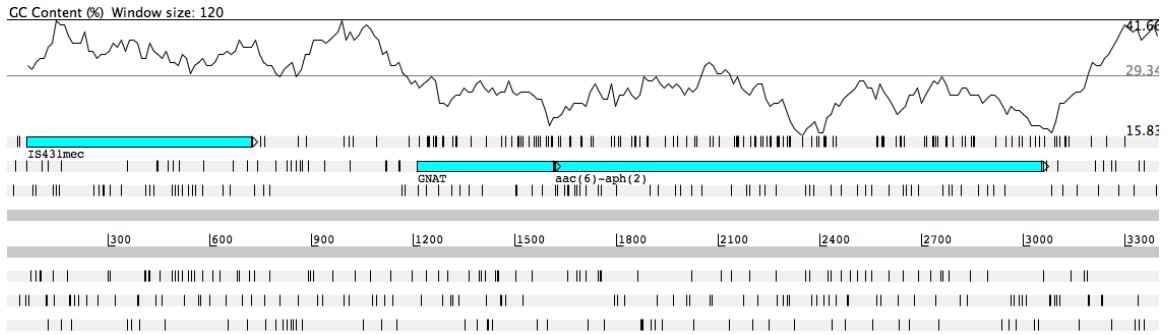

**Supplementary Figure 6.** Artemis review of 3,465 bp transposon containing IS431mec transposase and *aac(6')*-*aph(2'')*.

## References

1. Werckenthin C, Schwarz S, Westh H. Structural Alterations in the Translational Attenuator of Constitutively Expressed ermC Genes. *Antimicrob Agents Chemother.* **1999**; 43(7):1681–1685.
2. Somkuti GA, Solaiman DK, Steinberg DH. Molecular properties of the erythromycin resistance plasmid pPV141 from *Staphylococcus chromogenes*. **1997**; 37(2):119–27.
